# Supplementary material for: Fe(II) stability in coastal seawater during experiments in Patagonia, Svalbard, and Gran Canaria
Source: Copernicus journal article supplement (doi:10.5194/bg-17-1327-2020), 2020-03-16
Supplement: Supplementary file 1 [file bg-17-1327-2020-supplement.zip]

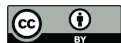

*Supplement of*

**Fe(II) stability in coastal seawater during experiments in Patagonia, Svalbard, and Gran Canaria**

**Mark J. Hopwood et al.**

*Correspondence to:* Mark J. Hopwood (mhopwood@geomar.de)

- [bg-17-1327-2020-supplement-title-page.pdf](#)
- Sup Mat
  - [Supplementary Material A Decay Constants R1.pdf](#)
  - [Supplementary Material B.pdf](#)

The copyright of individual parts of the supplement might differ from the CC BY 4.0 License.
