# Supplementary material for: Fe(II) stability in coastal seawater during experiments in Patagonia, Svalbard, and Gran Canaria
Source: Copernicus journal article supplement (doi:10.5194/bg-17-1327-2020), 2020-03-16
Supplement: Supplementary file 2 [file bg-17-1327-2020-supplement.zip]

## Supplementary Material

### Mesocosm/multistressor/microcosm experiment designs.

*C*, Carbon, denotes an addition of dissolved organic carbon (glucose) relative to  $PO_4$  according to the Redfield ratio.

*HG/LG*, high grazing/low grazing, denotes where zooplankton were added

*LpH*, low pH, denotes where pH were lowered by acid addition

### I Mesocosm design. MesoPat and MesoArc.

| DOC          | 0     | 0.5     | 1     | 2     | 3     |
|--------------|-------|---------|-------|-------|-------|
| Low Grazing  | LG 0C | LG 0.5C | LG 1C | LG 2C | LG 3C |
| High Grazing | HG 0C | HG 0.5C | HG 1C | HG 2C | HG 3C |

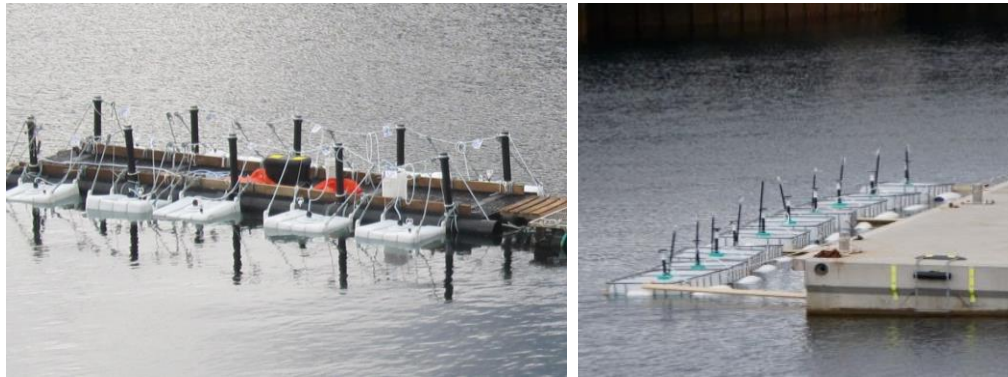

Large HDPE containers were incubated at ambient seawater temperatures tethered to jetties. *Left MesoPat, right MesoArc.*

### II Multistressor design. MultiPat and MultiArc.

| DOC       |              | 0         | 0.5         | 1         | 2         |
|-----------|--------------|-----------|-------------|-----------|-----------|
| Normal pH | Low Grazing  | LG 0C     | LG 0.5C     | LG 1C     | LG 2C     |
|           | High Grazing | HG 0C     | HG 0.5C     | HG 1C     | HG 2C     |
| Low pH    | Low Grazing  | LG 0C LpH | LG 0.5C LpH | LG 1C LpH | LG 2C LpH |
|           | High Grazing | HG 0C LpH | HG 0.5C LpH | HG 1C LpH | HG 2C LpH |

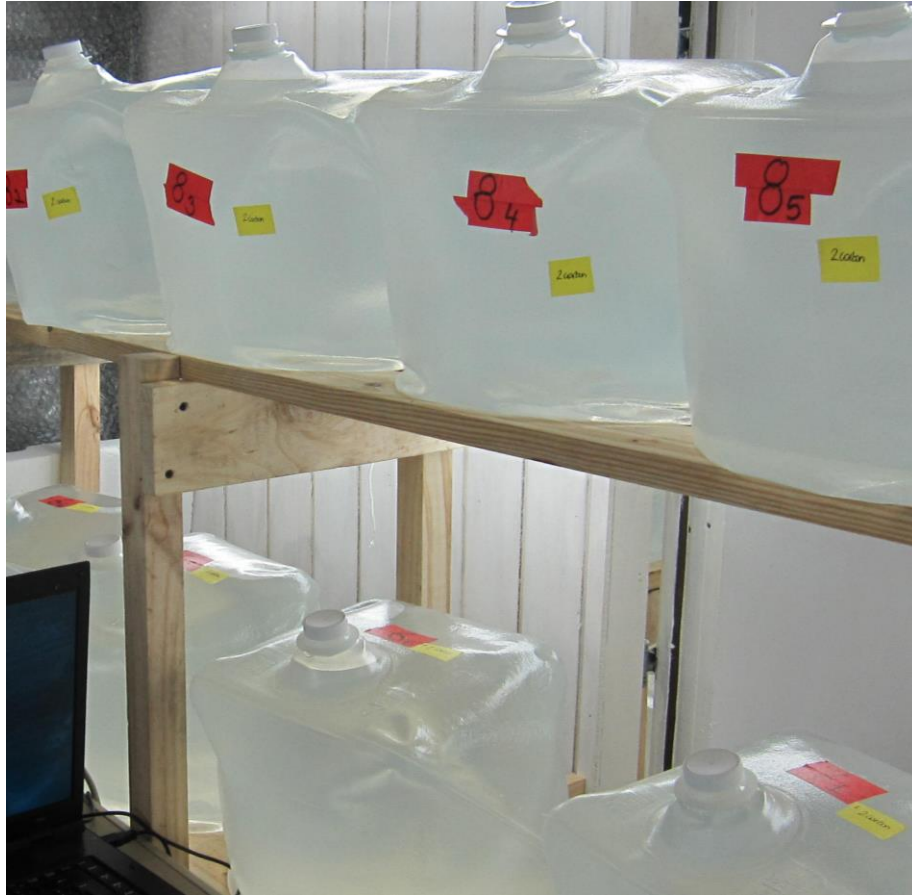

20 L containers for the multistressor experiment (one container per sampling day) were incubated on custom made racks designed to ensure equal distribution of light and to facilitate easy access to the containers for mixing/sampling (*Patagonia multistressor room shown*).

### III microcosm design. MicroPat.

The experiment matrix of I was used but with the 20 L collapsible container setup of II rather than the large 1000 L containers used for I.

### IV Gran Canaria mesocosm

|                            |     |      |     |      |     |      |     |      |
|----------------------------|-----|------|-----|------|-----|------|-----|------|
| pCO <sub>2</sub> /<br>μatm | 550 | 1300 | 850 | 1000 | 400 | 1450 | 700 | 1150 |
| Mesocosm                   | 1   | 2    | 3   | 4    | 5   | 6    | 7   | 8    |

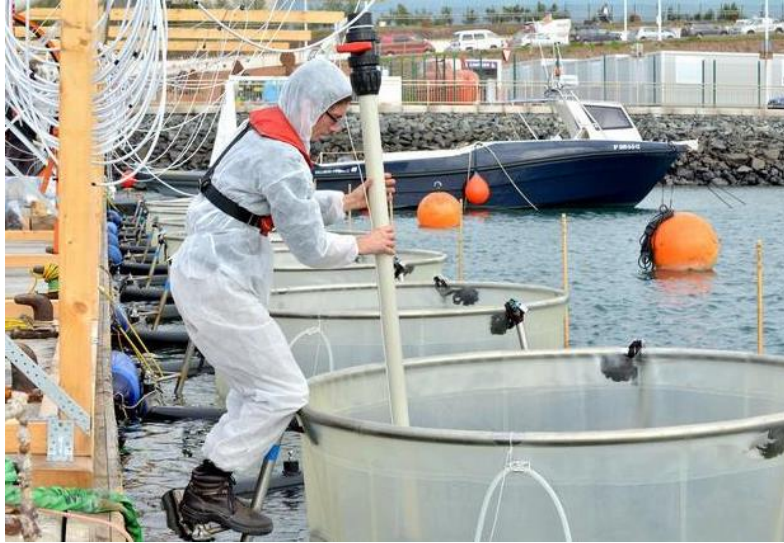

Polyurethane bags, supported by steel framework, were tethered to a jetty in Taliarte. During sampling the mesocosms were pulled adjacent to the jetty (*as shown*), otherwise the mesocosms were free to float 2-3 m away from the jetty.
