# Supplementary material for: Fe(II) stability in coastal seawater during experiments in Patagonia, Svalbard, and Gran Canaria
Source: Copernicus journal article supplement (doi:10.5194/bg-17-1327-2020), 2020-03-16
Supplement: Supplementary file 3 [file bg-17-1327-2020-supplement.zip]

| Location     | Meso/micro/ Zooplankton | Experiment | H2O2              |                    |          |         |                |             |              |                |       |               |        | O2 sat<br>/ μM | Calculated k<br>/ min-1 | Linear R2 |
|--------------|-------------------------|------------|-------------------|--------------------|----------|---------|----------------|-------------|--------------|----------------|-------|---------------|--------|----------------|-------------------------|-----------|
|              | multi unit<br>number    |            | (Low or<br>High)) | Temperature<br>/ k | Salinity | pH free | Oxygen<br>/ μM | DFe /<br>nM | TdFe<br>/ nM | Fe(II)<br>/ nM | / nM  | k / min-<br>1 | Δk     |                |                         |           |
| Laboratory c | n/a                     | n/a        | Laboratory cc     | 294                | 33.2     | 8.10    | 225            | 1.0         | ND           | 37.0           | BD    | 0.120         | -0.076 | 225            | 0.197                   | 1.00      |
| Laboratory c | n/a                     | n/a        | Laboratory cc     | 295                | 34.3     | 8.10    | 220            | 1.0         | ND           | 5.7            | BD    | 0.092         | -0.134 | 220            | 0.226                   | 1.00      |
| Laboratory c | n/a                     | n/a        | Laboratory cc     | 295                | 34.3     | 8.10    | 220            | 1.0         | ND           | 5.7            | 15.39 | 0.105         | -0.121 | 220            | 0.226                   | 0.98      |
| Laboratory c | n/a                     | n/a        | Laboratory cc     | 295                | 34.3     | 8.10    | 220            | 1.0         | ND           | 5.7            | 19.24 | 0.156         | -0.070 | 220            | 0.226                   | 0.99      |
| Laboratory c | n/a                     | n/a        | Laboratory cc     | 295                | 34.3     | 8.10    | 220            | 1.0         | ND           | 5.7            | 23.09 | 0.192         | -0.034 | 220            | 0.226                   | 0.98      |
| Laboratory c | n/a                     | n/a        | Laboratory cc     | 295                | 34.3     | 8.10    | 220            | 1.0         | ND           | 5.7            | 30.78 | 0.187         | -0.039 | 220            | 0.226                   | 0.98      |
| Laboratory c | n/a                     | n/a        | Laboratory cc     | 295                | 34.3     | 8.10    | 220            | 1.0         | ND           | 5.7            | BD    | 0.196         | -0.030 | 220            | 0.226                   | 0.96      |
| Laboratory c | n/a                     | n/a        | Laboratory cc     | 295                | 34.3     | 8.10    | 220            | 1.0         | ND           | 5.7            | BD    | 0.183         | -0.043 | 220            | 0.226                   | 0.96      |
| Laboratory c | n/a                     | n/a        | Laboratory cc     | 295                | 34.3     | 8.10    | 220            | 1.0         | ND           | 5.7            | BD    | 0.326         | 0.100  | 220            | 0.226                   | 0.62      |
| Laboratory c | n/a                     | n/a        | Laboratory cc     | 295                | 34.3     | 8.10    | 220            | 1.0         | ND           | 5.7            | BD    | 0.153         | -0.073 | 220            | 0.226                   | 0.96      |
| Laboratory c | n/a                     | n/a        | Laboratory cc     | 295                | 34.2     | 8.10    | 220            | 1.0         | ND           | 7.6            | BD    | 0.085         | -0.142 | 220            | 0.226                   | 0.99      |
| Laboratory c | n/a                     | n/a        | Laboratory cc     | 295                | 34.2     | 8.10    | 220            | 1.0         | ND           | 7.6            | 15.36 | 0.075         | -0.151 | 220            | 0.226                   | 0.93      |
| Laboratory c | n/a                     | n/a        | Laboratory cc     | 295                | 34.2     | 8.10    | 220            | 1.0         | ND           | 7.6            | 15.36 | 0.040         | -0.186 | 220            | 0.226                   | 0.24      |
| Laboratory c | n/a                     | n/a        | Laboratory cc     | 295                | 34.2     | 8.10    | 222            | 1.0         | ND           | 7.6            | BD    | 0.087         | -0.117 | 222            | 0.205                   | 1.00      |
| Laboratory c | n/a                     | n/a        | Laboratory cc     | 295                | 34.2     | 8.10    | 222            | 1.0         | ND           | 7.6            | 15.36 | 0.143         | -0.062 | 222            | 0.205                   | 1.00      |
| Laboratory c | n/a                     | n/a        | Laboratory cc     | 295                | 34.2     | 8.10    | 222            | 1.0         | ND           | 7.6            | 19.2  | 0.164         | -0.041 | 222            | 0.205                   | 1.00      |
| Laboratory c | n/a                     | n/a        | Laboratory cc     | 295                | 34.2     | 8.10    | 222            | 1.0         | ND           | 7.6            | 23.04 | 0.169         | -0.036 | 222            | 0.205                   | 1.00      |
| Laboratory c | n/a                     | n/a        | Laboratory cc     | 295                | 34.2     | 8.10    | 222            | 1.0         | ND           | 7.6            | 30.72 | 0.192         | -0.013 | 222            | 0.205                   | 0.99      |
| Laboratory c | n/a                     | n/a        | Laboratory cc     | 295                | 34.4     | 8.10    | 222            | 1.0         | ND           | 3.8            | BD    | 0.092         | -0.112 | 222            | 0.204                   | 1.00      |
| Laboratory c | n/a                     | n/a        | Laboratory cc     | 295                | 34.4     | 8.10    | 222            | 1.0         | ND           | 3.8            | 15.42 | 0.080         | -0.124 | 222            | 0.204                   | 1.00      |
| Laboratory c | n/a                     | n/a        | Laboratory cc     | 295                | 34.4     | 8.10    | 222            | 1.0         | ND           | 3.8            | 19.28 | 0.138         | -0.066 | 222            | 0.204                   | 1.00      |
| Laboratory c | n/a                     | n/a        | Laboratory cc     | 295                | 34.4     | 8.10    | 222            | 1.0         | ND           | 3.8            | 23.13 | 0.156         | -0.048 | 222            | 0.204                   | 0.99      |
| Laboratory c | n/a                     | n/a        | Laboratory cc     | 295                | 34.4     | 8.10    | 222            | 1.0         | ND           | 3.8            | 30.84 | 0.169         | -0.035 | 222            | 0.204                   | 0.99      |
| Laboratory c | n/a                     | n/a        | Laboratory cc     | 295                | 34.4     | 8.10    | 220            | 1.0         | ND           | 1.9            | BD    | 0.071         | -0.151 | 220            | 0.222                   | 0.94      |
| Laboratory c | n/a                     | n/a        | Laboratory cc     | 295                | 34.4     | 8.10    | 220            | 1.0         | ND           | 1.9            | 15.45 | 0.144         | -0.079 | 220            | 0.222                   | 0.99      |
| Laboratory c | n/a                     | n/a        | Laboratory cc     | 295                | 34.4     | 8.10    | 220            | 1.0         | ND           | 1.9            | 19.32 | 0.198         | -0.025 | 220            | 0.222                   | 0.99      |
| Laboratory c | n/a                     | n/a        | Laboratory cc     | 295                | 34.4     | 8.10    | 220            | 1.0         | ND           | 1.9            | 23.18 | 0.275         | 0.052  | 220            | 0.222                   | 0.98      |
| Laboratory c | n/a                     | n/a        | Laboratory cc     | 295                | 34.4     | 8.10    | 220            | 1.0         | ND           | 1.9            | 30.9  | 0.183         | -0.039 | 220            | 0.222                   | 0.98      |
| Laboratory c | n/a                     | n/a        | Laboratory cc     | 295                | 34.3     | 8.10    | 220            | 1.0         | ND           | 5.7            | BD    | 0.089         | -0.133 | 220            | 0.223                   | 1.00      |
| Laboratory c | n/a                     | n/a        | Laboratory cc     | 295                | 34.3     | 8.10    | 220            | 1.0         | ND           | 5.7            | 15.39 | 0.304         | 0.081  | 220            | 0.223                   | 0.98      |

|                  |      |               |     |      |      |     |     |      |      |       |       |        |     |       |      |
|------------------|------|---------------|-----|------|------|-----|-----|------|------|-------|-------|--------|-----|-------|------|
| Laboratory c n/a | n/a  | Laboratory cc | 295 | 34.3 | 8.10 | 220 | 1.0 | ND   | 5.7  | 19.24 | 0.323 | 0.100  | 220 | 0.223 | 0.99 |
| Laboratory c n/a | n/a  | Laboratory cc | 295 | 34.3 | 8.10 | 220 | 1.0 | ND   | 5.7  | 23.09 | 0.206 | -0.017 | 220 | 0.223 | 0.98 |
| Laboratory c n/a | n/a  | Laboratory cc | 295 | 34.3 | 8.10 | 220 | 1.0 | ND   | 5.7  | 30.78 | 0.218 | -0.005 | 220 | 0.223 | 0.99 |
| Laboratory c n/a | n/a  | Laboratory cc | 278 | 34.4 | 8.10 | 316 | 1.0 | ND   | 3.8  | BD    | 0.050 | 0.032  | 316 | 0.018 | 0.87 |
| Laboratory c n/a | n/a  | Laboratory cc | 278 | 34.4 | 8.10 | 316 | 1.0 | ND   | 3.8  | 15.42 | 0.042 | 0.024  | 316 | 0.018 | 0.97 |
| Laboratory c n/a | n/a  | Laboratory cc | 278 | 34.4 | 8.10 | 316 | 1.0 | ND   | 3.8  | 19.28 | 0.064 | 0.046  | 316 | 0.018 | 0.97 |
| Laboratory c n/a | n/a  | Laboratory cc | 278 | 34.4 | 8.10 | 316 | 1.0 | ND   | 3.8  | 23.13 | 0.043 | 0.025  | 316 | 0.018 | 0.93 |
| Laboratory c n/a | n/a  | Laboratory cc | 278 | 34.4 | 8.10 | 316 | 1.0 | ND   | 3.8  | 30.84 | 0.054 | 0.036  | 316 | 0.018 | 0.97 |
| Laboratory c n/a | n/a  | Laboratory cc | 278 | 34.4 | 8.10 | 316 | 1.0 | ND   | 1.9  | BD    | 0.017 | -0.001 | 316 | 0.018 | 0.73 |
| Laboratory c n/a | n/a  | Laboratory cc | 278 | 34.4 | 8.10 | 317 | 1.0 | ND   | 1.9  | 15.45 | 0.074 | 0.057  | 317 | 0.017 | 0.86 |
| Laboratory c n/a | n/a  | Laboratory cc | 278 | 34.4 | 8.10 | 317 | 1.0 | ND   | 1.9  | 19.32 | 0.014 | -0.004 | 317 | 0.017 | 0.56 |
| Laboratory c n/a | n/a  | Laboratory cc | 278 | 34.4 | 8.10 | 317 | 1.0 | ND   | 1.9  | 23.18 | 0.016 | -0.002 | 317 | 0.017 | 0.48 |
| Laboratory c n/a | n/a  | Laboratory cc | 278 | 34.4 | 8.10 | 317 | 1.0 | ND   | 1.9  | 30.9  | 0.014 | -0.003 | 317 | 0.017 | 0.16 |
| Laboratory c n/a | n/a  | Laboratory cc | 281 | 34.2 | 8.10 | 292 | 1.0 | ND   | 7.6  | BD    | 0.009 | -0.018 | 292 | 0.028 | 0.91 |
| Laboratory c n/a | n/a  | Laboratory cc | 294 | 34.2 | 8.10 | 223 | 1.0 | ND   | 9.5  | BD    | 0.134 | -0.060 | 223 | 0.194 | 0.99 |
| Laboratory c n/a | n/a  | Laboratory cc | 294 | 33.8 | 8.10 | 224 | 1.0 | ND   | 18.9 | BD    | 0.162 | -0.033 | 224 | 0.195 | 0.92 |
| Patagonia        | 1 L  | MicroPat      | 289 | 28.4 | 8.32 | 384 | 5.0 | 6.9  | 0.5  | 10.0  | 0.003 | -0.438 | 254 | 0.441 | 0.81 |
| Patagonia        | 4 H  | MicroPat      | 289 | 28.5 | 8.29 | 449 | 5.6 | 7.2  | 1.3  | 12.7  | 0.000 | -0.401 | 256 | 0.401 | 0.03 |
| Patagonia        | 6 H  | MicroPat      | 290 | 28.0 | 8.20 | 375 | 6.4 | 6.1  | 1.2  | 15.5  | 0.000 | -0.288 | 250 | 0.288 | 0.01 |
| Patagonia        | 3 L  | MicroPat      | 288 | 28.4 | 8.24 | 425 | 5.8 | 4.6  | 1.6  | 15.0  | 0.009 | -0.246 | 261 | 0.254 | 0.94 |
| Patagonia        | 2 H  | MicroPat      | 288 | 28.3 | 8.26 | 388 | 3.3 | 11.7 | 0.5  | 14.8  | 0.010 | -0.248 | 262 | 0.258 | 0.59 |
| Patagonia        | 8 H  | MicroPat      | 290 | 27.8 | 8.09 | 385 | 3.3 | 4.1  | 1.3  | 18.9  | 0.002 | -0.178 | 250 | 0.180 | 0.36 |
| Patagonia        | 5 L  | MicroPat      | 289 | 27.8 | 8.16 | 370 | 5.6 | 6.9  | 1.1  | 10.2  | 0.001 | -0.184 | 257 | 0.186 | 0.34 |
| Patagonia        | 7 L  | MicroPat      | 289 | 27.7 | 8.12 | 394 | 4.1 | 5.0  | 0.5  | 10.4  | 0.004 | -0.170 | 255 | 0.174 | 0.42 |
| Patagonia        | 10 H | MicroPat      | 291 | 27.6 | 7.90 | 343 | 3.6 | 3.7  | 1.9  | 21.6  | 0.000 | -0.082 | 246 | 0.082 | 0.01 |
| Patagonia        | 9 L  | MicroPat      | 291 | 27.8 | 7.89 | 335 | ND  | 7.4  | 1.6  | 10.3  | 0.001 | -0.077 | 245 | 0.078 | 0.17 |
| Patagonia        | 4 H  | MesoPat       | 287 | 27.5 | 7.97 | 344 | 6.2 | 40.0 | 5.7  | 50.7  | 0.005 | -0.052 | 266 | 0.057 | 0.49 |
| Patagonia        | 1 L  | MesoPat       | 287 | 28.0 | 8.00 | 352 | 3.7 | 46.2 | 2.5  | 7.6   | 0.006 | -0.055 | 268 | 0.061 | 0.02 |
| Patagonia        | 2 H  | MesoPat       | 286 | 22.7 | 7.91 | 369 | 8.6 | 72.8 | 3.8  | 16.6  | 0.009 | -0.035 | 280 | 0.044 | 0.70 |
| Patagonia        | 3 L  | MesoPat       | 287 | 23.1 | 7.90 | 361 | 7.9 | 21.6 | 16.0 | 70.8  | 0.012 | -0.036 | 274 | 0.047 | 0.87 |
| Patagonia        | 7 L  | MesoPat       | 286 | 27.9 | 7.77 | 347 | 5.2 | 20.8 | 3.8  | 9.0   | 0.003 | -0.019 | 270 | 0.023 | 0.19 |
| Patagonia        | 5 L  | MesoPat       | 286 | 28.0 | 7.79 | 351 | 4.5 | 24.3 | 3.5  | 7.8   | 0.005 | -0.021 | 269 | 0.025 | 0.39 |
| Patagonia        | 1 L  | MesoPat       | 286 | 28.0 | 7.82 | 371 | 4.2 | 52.8 | 3.3  | 9.0   | 0.007 | -0.023 | 269 | 0.029 | 0.32 |

|           |      |         |     |      |      |     |      |      |      |      |       |        |     |       |      |
|-----------|------|---------|-----|------|------|-----|------|------|------|------|-------|--------|-----|-------|------|
| Patagonia | 1 L  | MesoPat | 285 | 28.0 | 7.78 | 359 | 4.5  | 21.3 | 2.4  | 9.9  | 0.004 | -0.017 | 275 | 0.021 | 0.45 |
| Patagonia | 7 L  | MesoPat | 287 | 27.7 | 7.77 | 340 | 3.9  | 27.8 | 4.8  | 23.9 | 0.006 | -0.018 | 268 | 0.024 | 0.75 |
| Patagonia | 2 H  | MesoPat | 285 | 28.0 | 7.60 | 350 | 33.9 | 60.9 | 6.1  | 79.3 | 0.006 | -0.005 | 277 | 0.010 | 0.28 |
| Patagonia | 1 L  | MesoPat | 286 | 28.0 | 8.02 | 367 | 2.7  | 58.6 | 0.5  | ND   | 0.024 | -0.039 | 271 | 0.063 | 0.34 |
| Patagonia | 1 L  | MesoPat | 285 | 28.0 | 7.63 | 348 | 7.9  | 27.4 | 11.2 | 79.3 | 0.007 | -0.005 | 277 | 0.011 | 0.73 |
| Patagonia | 4 H  | MesoPat | 285 | 27.6 | 7.88 | 352 | 6.3  | 40.8 | 3.9  | 7.6  | 0.014 | -0.016 | 276 | 0.029 | 0.56 |
| Patagonia | 8 H  | MesoPat | 284 | 28.0 | 7.71 | 374 | 3.6  | ND   | 0.3  | 19.6 | 0.013 | -0.001 | 283 | 0.014 | 0.55 |
| Patagonia | 1 L  | MesoPat | 284 | 28.0 | 8.11 | 382 | 2.9  | 26.7 | 0.5  | 6.3  | 0.035 | -0.034 | 283 | 0.069 | 0.66 |
| Patagonia | 1 L  | MesoPat | 285 | 28.0 | 7.68 | 353 | ND   | 30.4 | 1.9  | 35.5 | 0.018 | 0.005  | 279 | 0.013 | 0.96 |
| Patagonia | 7 L  | MesoPat | 285 | 27.7 | 7.76 | 363 | 6.5  | 14.1 | 0.9  | 29.0 | 0.023 | 0.005  | 281 | 0.017 | 0.89 |
| Patagonia | 2 H  | MesoPat | 285 | 28.0 | 7.70 | 318 | 12.2 | 66.4 | 2.6  | 54.8 | 0.022 | 0.010  | 279 | 0.012 | 0.90 |
| Patagonia | 4 H  | MesoPat | 286 | 27.5 | 7.90 | 354 | 5.2  | 73.7 | 0.9  | 10.5 | 0.032 | -0.006 | 272 | 0.037 | 0.94 |
| Patagonia | 4 H  | MesoPat | 285 | 27.5 | 7.92 | 364 | 4.9  | 35.3 | 0.9  | 38.8 | 0.050 | 0.018  | 281 | 0.032 | 0.92 |
| Svalbard  | 11 H | MesoArc | 281 | 33.8 | 8.18 | 382 | 4.2  | 81.5 | 1.8  | 2.4  | 0.003 | -0.049 | 293 | 0.052 | 0.43 |
| Svalbard  | 9 H  | MesoArc | 278 | 33.8 | 8.28 | 388 | 5.6  | 58.9 | 0.5  | 2.8  | 0.002 | -0.047 | 319 | 0.049 | 0.10 |
| Svalbard  | 11 H | MesoArc | 280 | 33.8 | 8.19 | 381 | 7.9  | 84.9 | 2.0  | 1.9  | 0.001 | -0.046 | 301 | 0.047 | 0.01 |
| Svalbard  | 5 H  | MesoArc | 278 | 33.8 | 8.25 | 394 | 7.6  | 39.4 | 1.5  | 46.7 | 0.002 | -0.042 | 319 | 0.044 | 0.18 |
| Svalbard  | 7 H  | MesoArc | 278 | 33.8 | 8.28 | 397 | 6.2  | 44.4 | 3.2  | 49.4 | 0.002 | -0.049 | 319 | 0.051 | 0.28 |
| Svalbard  | 7 H  | MesoArc | 278 | 33.8 | 8.27 | 398 | 5.0  | 37.7 | 1.7  | 17.4 | 0.001 | -0.047 | 319 | 0.048 | 0.07 |
| Svalbard  | 5 L  | MesoArc | 278 | 33.8 | 8.23 | 388 | 5.9  | 32.8 | 1.3  | 25.7 | 0.000 | -0.038 | 319 | 0.039 | 0.03 |
| Svalbard  | 9 L  | MesoArc | 278 | 33.8 | 8.24 | 385 | 5.8  | 33.9 | 0.6  | 2.8  | 0.000 | -0.041 | 319 | 0.041 | 0.01 |
| Svalbard  | 5 H  | MesoArc | 278 | 33.8 | 8.24 | 390 | 6.5  | 32.2 | 2.2  | 28.0 | 0.001 | -0.041 | 319 | 0.042 | 0.13 |
| Svalbard  | 7 L  | MesoArc | 278 | 33.8 | 8.26 | 399 | 11.0 | 40.4 | 2.7  | 22.7 | 0.002 | -0.044 | 319 | 0.046 | 0.48 |
| Svalbard  | 11 L | MesoArc | 281 | 33.8 | 8.05 | 377 | 6.2  | 99.5 | 1.8  | 1.4  | 0.000 | -0.029 | 293 | 0.029 | 0.16 |
| Svalbard  | 9 H  | MesoArc | 278 | 33.8 | 8.22 | 386 | 4.6  | 39.8 | 2.3  | 15.2 | 0.001 | -0.035 | 321 | 0.036 | 0.13 |
| Svalbard  | 5 H  | MesoArc | 277 | 33.8 | 8.25 | 390 | 5.1  | 40.3 | 2.0  | 35.0 | 0.001 | -0.036 | 326 | 0.037 | 0.13 |
| Svalbard  | 9 H  | MesoArc | 278 | 33.8 | 8.18 | 387 | 4.5  | 63.0 | 0.8  | 4.5  | 0.000 | -0.031 | 319 | 0.031 | 0.01 |
| Svalbard  | 5 L  | MesoArc | 278 | 33.8 | 8.25 | 389 | 8.7  | 31.3 | 2.0  | 28.0 | 0.002 | -0.040 | 319 | 0.042 | 0.18 |
| Svalbard  | 5 L  | MesoArc | 277 | 33.8 | 8.23 | 391 | 6.9  | 35.1 | 2.0  | 25.7 | 0.000 | -0.033 | 326 | 0.034 | 0.02 |
| Svalbard  | 7 L  | MesoArc | 278 | 33.8 | 8.24 | 395 | 4.9  | 46.2 | 3.3  | 57.5 | 0.002 | -0.037 | 324 | 0.038 | 0.35 |
| Svalbard  | 11 L | MesoArc | 279 | 33.8 | 8.12 | 380 | 5.6  | 39.3 | 1.6  | 1.0  | 0.001 | -0.026 | 310 | 0.027 | 0.12 |
| Svalbard  | 9 L  | MesoArc | 278 | 33.8 | 8.16 | 387 | 5.0  | 29.5 | 1.3  | 9.3  | 0.005 | -0.021 | 321 | 0.026 | 0.69 |
| Svalbard  | 9 L  | MesoArc | 278 | 33.8 | 8.17 | 388 | 6.2  | 48.8 | 1.2  | 4.8  | 0.012 | -0.016 | 319 | 0.029 | 0.77 |

|           |      |          |     |      |      |     |      |       |     |      |       |        |     |       |      |
|-----------|------|----------|-----|------|------|-----|------|-------|-----|------|-------|--------|-----|-------|------|
| Patagonia | 2 H  | MultiPat | 290 | 30.9 | 8.01 | 352 | 8.9  | 32.3  | 2.1 | 9.0  | 0.001 | -0.109 | 245 | 0.110 | 0.09 |
| Patagonia | 1 L  | MultiPat | 290 | 30.9 | 7.92 | 338 | 5.2  | 19.9  | 1.8 | 9.5  | 0.001 | -0.074 | 245 | 0.074 | 0.28 |
| Patagonia | 5 L  | MultiPat | 288 | 30.9 | 8.00 | 354 | 8.7  | 22.3  | 1.3 | 7.2  | 0.001 | -0.077 | 254 | 0.078 | 0.28 |
| Patagonia | 6 H  | MultiPat | 288 | 30.9 | 7.94 | 345 | 4.3  | 17.1  | 1.3 | 5.5  | 0.001 | -0.058 | 254 | 0.059 | 0.46 |
| Patagonia | 8 H  | MultiPat | 287 | 30.9 | 7.98 | 352 | 3.7  | 19.1  | 1.3 | 8.0  | 0.001 | -0.058 | 260 | 0.059 | 0.45 |
| Patagonia | 7 L  | MultiPat | 287 | 30.9 | 7.95 | 349 | 2.7  | 16.6  | 1.4 | 6.7  | 0.000 | -0.052 | 260 | 0.053 | 0.13 |
| Patagonia | 3 L  | MultiPat | 287 | 30.9 | 7.84 | 336 | 4.5  | 11.8  | 1.4 | 10.5 | 0.000 | -0.033 | 260 | 0.033 | 0.06 |
| Patagonia | 10 H | MultiPat | 288 | 30.9 | 7.80 | 373 | 11.4 | 11.1  | 1.9 | 19.0 | 0.002 | -0.035 | 254 | 0.036 | 0.72 |
| Patagonia | 4 H  | MultiPat | 287 | 30.9 | 7.81 | 321 | 3.4  | 23.9  | 1.3 | 6.7  | 0.000 | -0.028 | 260 | 0.028 | 0.01 |
| Patagonia | 14 H | MultiPat | 288 | 30.9 | 7.68 | 359 | 4.7  | 205.7 | 1.0 | 7.8  | 0.000 | -0.022 | 254 | 0.023 | 0.35 |
| Patagonia | 13 L | MultiPat | 288 | 30.9 | 7.63 | 345 | 4.2  | 18.9  | 1.1 | 6.7  | 0.000 | -0.018 | 254 | 0.018 | 0.25 |
| Patagonia | 9 L  | MultiPat | 288 | 30.9 | 7.78 | 352 | 20.4 | 19.3  | 1.4 | 8.0  | 0.004 | -0.027 | 254 | 0.032 | 0.15 |
| Patagonia | 15 L | MultiPat | 289 | 30.9 | 7.46 | 349 | ND   | 13.3  | 1.2 | 11.2 | 0.001 | -0.011 | 252 | 0.012 | 0.46 |
| Patagonia | 12 H | MultiPat | 288 | 30.9 | 7.53 | 322 | 3.2  | 10.9  | 1.2 | 8.5  | 0.000 | -0.012 | 254 | 0.013 | 0.07 |
| Patagonia | 16 H | MultiPat | 289 | 30.9 | 7.58 | 315 | 4.5  | 12.2  | 1.8 | 9.9  | 0.003 | -0.013 | 252 | 0.016 | 0.34 |
| Patagonia | 11 L | MultiPat | 288 | 30.9 | 7.52 | 319 | 3.8  | 24.2  | 2.8 | 46.0 | 0.002 | -0.010 | 254 | 0.012 | 0.58 |
| Svalbard  | 5 H  | MultiArc | 278 | 33.8 | 8.43 | 412 | 5.8  | 117.6 | 2.0 | 4.9  | 0.001 | -0.113 | 319 | 0.114 | 0.01 |
| Svalbard  | 5 L  | MultiArc | 278 | 33.8 | 8.43 | 419 | 6.6  | 94.9  | 2.8 | 4.2  | 0.001 | -0.116 | 319 | 0.116 | 0.01 |
| Svalbard  | 1 L  | MultiArc | 277 | 33.8 | 8.34 | 409 | 11.8 | 170.4 | 1.5 | 1.9  | 0.008 | -0.050 | 329 | 0.058 | 0.01 |
| Svalbard  | 1 H  | MultiArc | 279 | 33.8 | 8.35 | 412 | 11.8 | 170.4 | 1.4 | 2.1  | 0.000 | -0.091 | 310 | 0.091 | 0.01 |
| Svalbard  | 1 H  | MultiArc | 280 | 33.8 | 7.76 | 408 | 11.8 | 170.4 | 2.2 | 5.6  | 0.005 | -0.004 | 301 | 0.008 | 0.17 |
| Svalbard  | 5 H  | MultiArc | 278 | 33.8 | 7.87 | 408 | 9.0  | 112.4 | 5.0 | 7.8  | 0.001 | -0.007 | 319 | 0.009 | 0.14 |
| Svalbard  | 5 L  | MultiArc | 278 | 33.8 | 7.87 | 407 | 5.4  | 84.7  | 2.4 | 4.9  | 0.001 | -0.007 | 319 | 0.009 | 0.14 |
| Svalbard  | 1 L  | MultiArc | 280 | 33.8 | 7.74 | 410 | 11.8 | 170.4 | 2.5 | 5.6  | 0.001 | -0.005 | 306 | 0.007 | 0.44 |
